# Supplementary material for: Postmortem Metabolomics: Strategies to Assess Time-Dependent Postmortem Changes of Diazepam, Nordiazepam, Morphine, Codeine, Mirtazapine and Citalopram
Source: MDPI journal article supplement (doi:10.3390/metabo11090643), 2021-09-20
Supplement: s1 [file s1]

## Supplementary Materials

### Postmortem metabolomics: Strategies to assess time-dependent postmortem changes of diazepam, nordiazepam, morphine, codeine, mirtazapine and citalopram

Lana Brockbals <sup>1</sup>, Yannick Wartmann <sup>1</sup>, Dylan Mantinieks <sup>2,3</sup>, Linda L. Glowacki <sup>3</sup>, Dimitri Gerostamoulos <sup>2,3</sup> Thomas Kraemer <sup>1</sup> and Andrea E. Steuer <sup>1,\*</sup>

<sup>1</sup> Department of Forensic Pharmacology and Toxicology, Zurich Institute of Forensic Medicine, University of Zurich, Winterthurerstrasse 190/52, 8057 Zurich, Switzerland

<sup>2</sup> Department of Forensic Medicine, Monash University, 65 Kavanagh Street, Southbank 3006, Victoria, Australia

<sup>3</sup> Victorian Institute of Forensic Medicine, 65 Kavanagh Street, Southbank 3006, Victoria, Australia

\* Correspondence: andrea.steuer@irm.uzh.ch

Figure S1: Direct visual comparison of the quantification results of the Victorian Institute of Forensic Medicine (VIFM; x-axis; in ng/mL) against the Zurich Institute of Forensic Medicine (ZIFM; y-axis; in ng/mL); straight line in all graphs follows the formula  $y = x$ , representing the perfect agreement between VIFM and ZIFM quantification data.

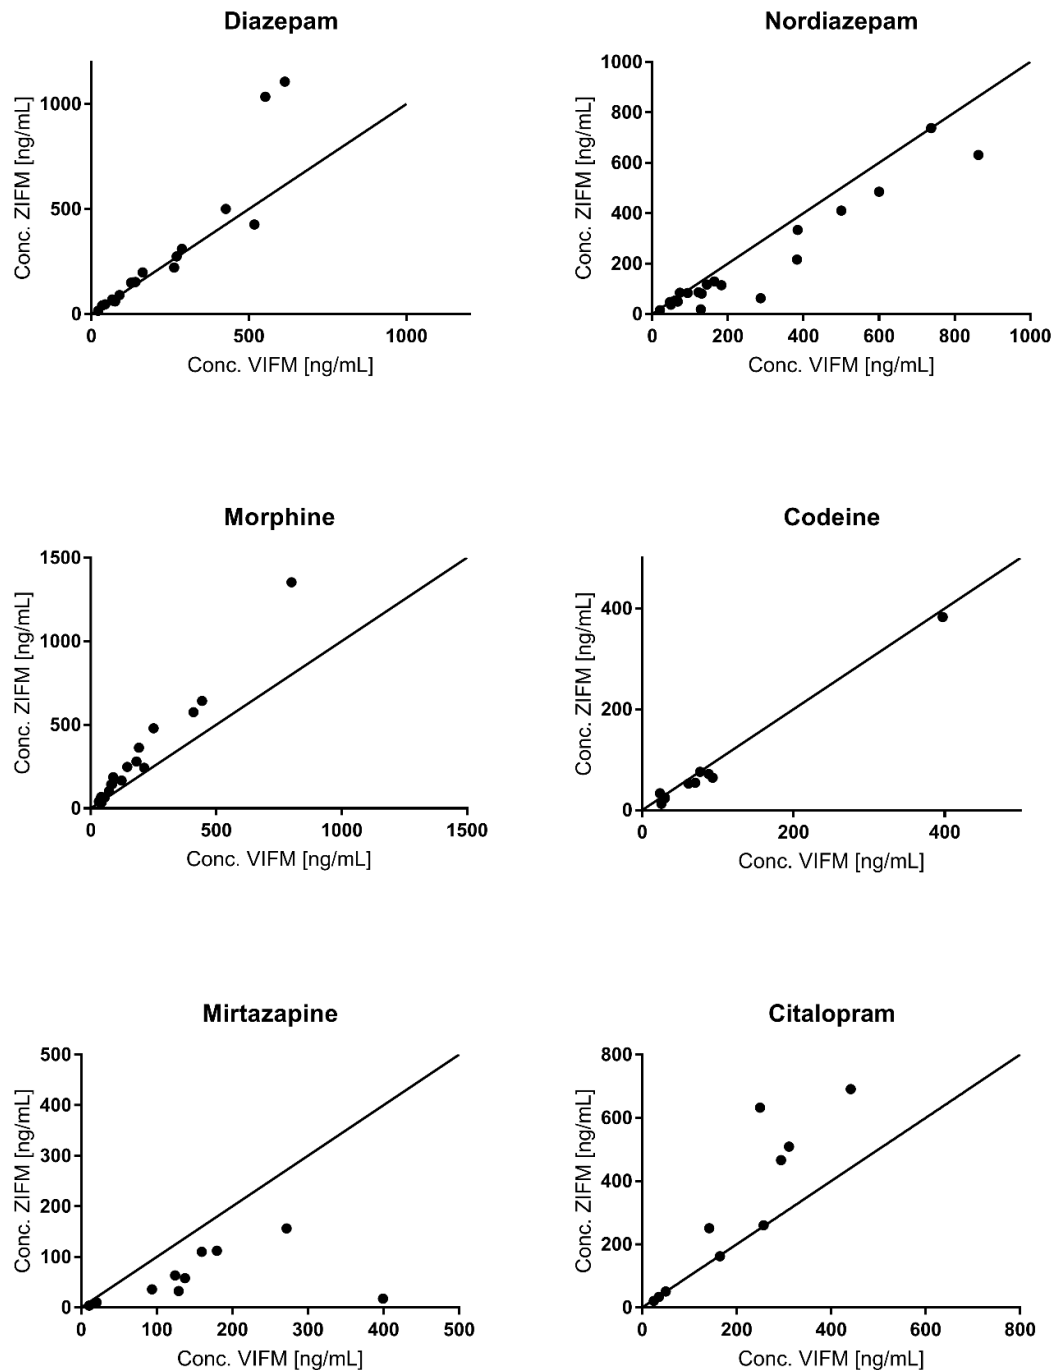

Figure S2: Visual representation of the Bland-Altman analyses; %Difference was calculated as  $(100 \times (B - A) / \text{Average})$  with A being the quantification results of the Zurich Institute of Forensic Medicine (ZIFM) and B being the initial quantification results of the Victorian Institute of Forensic Medicine (VIFM).

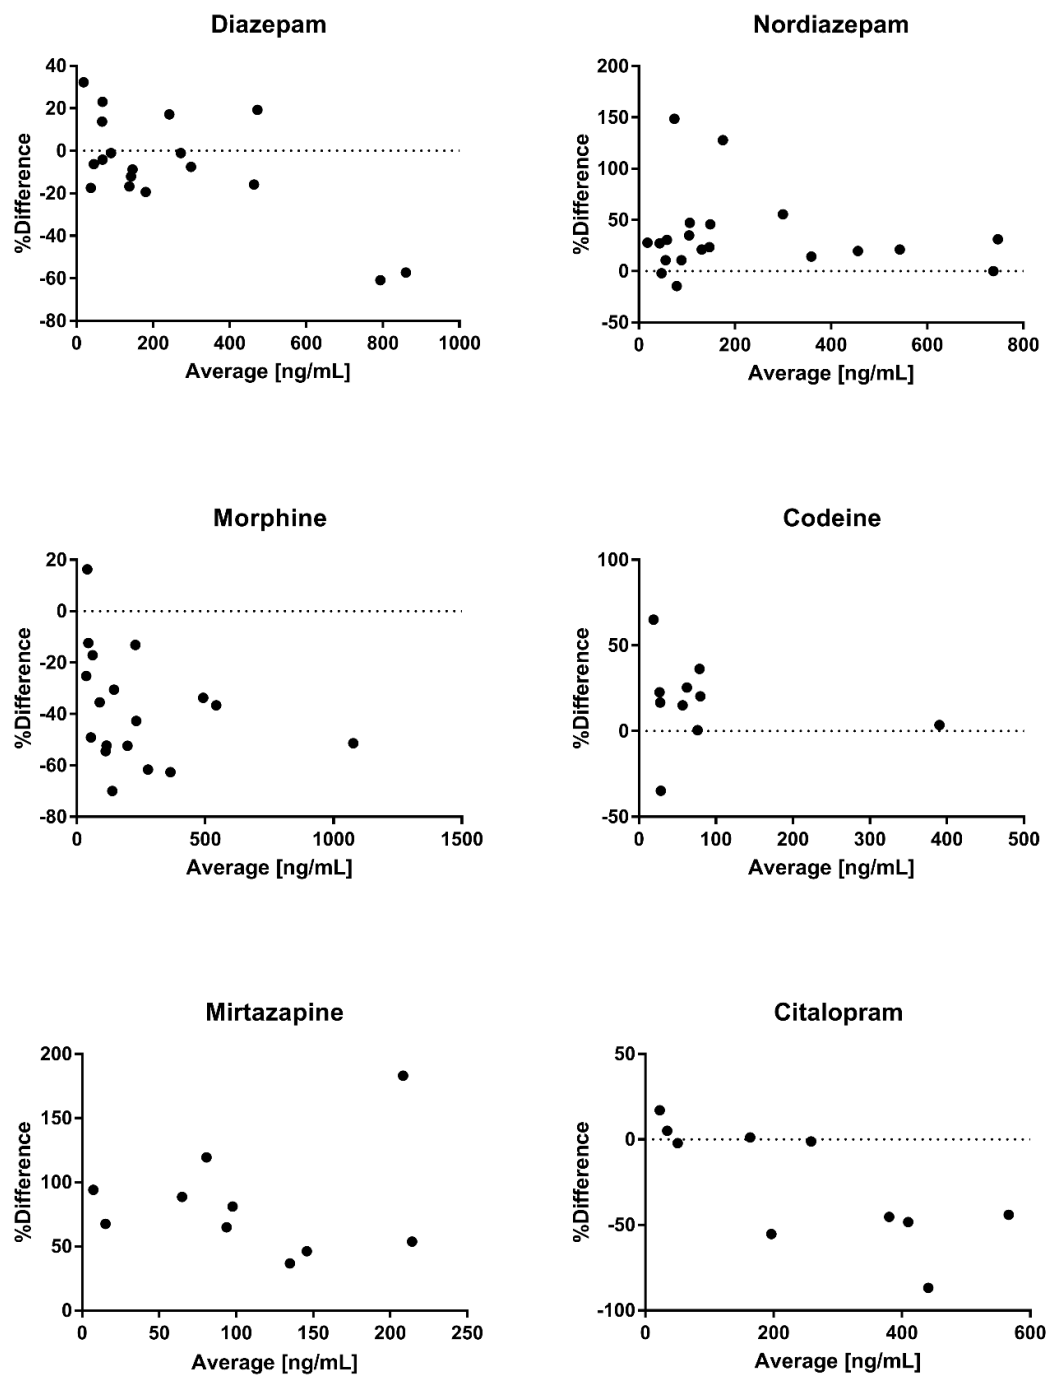

Table S1: Raw data (drug concentrations) with calculated concentration changes and sampling timings per case, sorted by drug (of abuse); concentration values below the lower limit of quantification are given in *italic*.

| Drug (of abuse) | Case number | Concentration [ng/mL] |     | Time-dependent concentration change [%] | Pre-admission interval (t0-t1) [h] | Pre-autopsy interval (t0-t2) [h] | $\Delta t$ (t1-t2) [h] |
|-----------------|-------------|-----------------------|-----|-----------------------------------------|------------------------------------|----------------------------------|------------------------|
|                 |             | t1                    | t2  |                                         |                                    |                                  |                        |
| Diazepam        | 2308        | 30                    | 18  | -41                                     | 3.0                                | 123                              | 120                    |
|                 | 2330        | 29                    | 24  | -16                                     | 8.9                                | 244                              | 235                    |
|                 | 2339        | 41                    | 26  | -36                                     | 6.8                                | 77                               | 70                     |
|                 | 2371        | 4.5                   | 14  | 218                                     | 22                                 | 141                              | 119                    |
|                 | 2388        | 19                    | 8.9 | -54                                     | 4.8                                | 159                              | 155                    |
|                 | 2432        | 11                    | 7.4 | -32                                     | 16                                 | 131                              | 115                    |
|                 | 2438        | 62                    | 32  | -49                                     | 7.9                                | 221                              | 213                    |
|                 | 2451        | 150                   | 96  | -37                                     | 3.2                                | 61                               | 57                     |
|                 | 2498        | 340                   | 240 | -30                                     | 3.5                                | 139                              | 136                    |
|                 | 2525        | 78                    | 110 | 43                                      | 8.6                                | 77                               | 68                     |
|                 | 2561        | 140                   | 70  | -51                                     | 5.4                                | 16                               | 11                     |
|                 | 2570        | 440                   | 210 | -52                                     | 4.2                                | 198                              | 194                    |
|                 | 2590        | 110                   | 54  | -52                                     | 2.8                                | 144                              | 141                    |
|                 | 2612        | 17                    | 14  | -18                                     | 18                                 | 270                              | 252                    |
|                 | 2622        | 13                    | 25  | 87                                      | 1.8                                | 72                               | 70                     |
|                 | 2651        | 430                   | 580 | 36                                      | 5.7                                | 29                               | 23                     |
|                 | 2656        | 5.7                   | 5.0 | -13                                     | 8.0                                | 150                              | 142                    |
|                 | 2658        | 60                    | 19  | -68                                     | 8.6                                | 29                               | 20                     |
|                 | 2665        | 270                   | 220 | -20                                     | 14                                 | 25                               | 12                     |
|                 | 2677        | 200                   | 65  | -68                                     | 19                                 | 163                              | 144                    |
|                 | 2688        | 87                    | 54  | -38                                     | 21                                 | 67                               | 46                     |
|                 | 2711        | 310                   | 210 | -32                                     | 6.3                                | 27                               | 21                     |
|                 | 2752        | 500                   | 140 | -72                                     | 8.9                                | 123                              | 114                    |
|                 | 2754        | 460                   | 470 | 3.1                                     | 6.0                                | 47                               | 41                     |
|                 | 2771        | 260                   | 160 | -40                                     | 12                                 | 93                               | 80                     |
|                 | 2772        | 36                    | 35  | -2.0                                    | 14                                 | 120                              | 106                    |
|                 | 2780        | 26                    | 14  | -45                                     | 6.3                                | 97                               | 90                     |
|                 | 2788        | 430                   | 470 | 8.6                                     | 15                                 | 38                               | 22                     |
|                 | 2789        | 71                    | 53  | -26                                     | 16                                 | 36                               | 21                     |
|                 | 2800        | 200                   | 160 | -24                                     | 3.1                                | 50                               | 46                     |
|                 | 2811        | 95                    | 68  | -29                                     | 25                                 | 91                               | 66                     |
|                 | 2816        | 470                   | 310 | -35                                     | 15                                 | 154                              | 139                    |
|                 | 2817        | 310                   | 150 | -52                                     | 7.3                                | 53                               | 46                     |
|                 | 2838        | 59                    | 36  | -39                                     | 127                                | 197                              | 70                     |
|                 | 2839        | 10                    | 11  | 10                                      | 28                                 | 120                              | 92                     |
|                 | 2843        | 300                   | 360 | 21                                      | 4.8                                | 15                               | 10                     |
|                 | 2876        | 39                    | 31  | -21                                     | 1.8                                | 57                               | 55                     |
|                 | 2878        | 49                    | 37  | -25                                     | 26                                 | 97                               | 71                     |
|                 | 2895        | 85                    | 82  | -4.0                                    | 5.9                                | 50                               | 44                     |
|                 | 2918        | 15                    | 6.1 | -58                                     | 5.0                                | 76                               | 71                     |
|                 | 2924        | 10                    | 10  | -0.5                                    | 11                                 | 26                               | 15                     |
|                 | 2927        | 57                    | 130 | 132                                     | 11                                 | 145                              | 134                    |
|                 | 2970        | 70                    | 49  | -29                                     | 3.4                                | 91                               | 88                     |

|  |      |      |     |      |     |     |     |
|--|------|------|-----|------|-----|-----|-----|
|  | 2978 | 31   | 24  | -23  | 5.1 | 98  | 93  |
|  | 2979 | 91   | 51  | -43  | 6.1 | 76  | 70  |
|  | 2999 | 80   | 81  | 1.4  | 3.4 | 15  | 12  |
|  | 3031 | 260  | 230 | -12  | 2.2 | 31  | 29  |
|  | 3033 | 11   | 4.5 | -59  | 6.7 | 173 | 167 |
|  | 3037 | 7.5  | 2.9 | -61  | 78  | 192 | 114 |
|  | 3044 | 37   | 25  | -32  | 23  | 114 | 91  |
|  | 3060 | 16   | 11  | -27  | 4.4 | 120 | 116 |
|  | 3073 | 220  | 180 | -17  | 9.7 | 46  | 36  |
|  | 3079 | 210  | 160 | -25  | 5.1 | 38  | 33  |
|  | 3080 | 280  | 89  | -69  | 4.0 | 300 | 296 |
|  | 3085 | 30   | 14  | -52  | 6.9 | 76  | 69  |
|  | 3089 | 410  | 290 | -30  | 8.2 | 127 | 119 |
|  | 3115 | 89   | 56  | -37  | 6.9 | 188 | 181 |
|  | 3121 | 4.2  | 5.5 | 28   | 32  | 192 | 160 |
|  | 3130 | 250  | 270 | 7.2  | 10  | 61  | 51  |
|  | 3131 | 100  | 92  | -11  | 3.8 | 28  | 24  |
|  | 3137 | 130  | 130 | 6.0  | 4.6 | 42  | 38  |
|  | 3168 | 84   | 120 | 37   | 5.0 | 66  | 61  |
|  | 3174 | 110  | 46  | -57  | 2.8 | 154 | 151 |
|  | 3180 | 100  | 85  | -15  | 2.7 | 383 | 381 |
|  | 3200 | 82   | 51  | -38  | 11  | 72  | 62  |
|  | 3205 | 130  | 110 | -11  | 5.9 | 85  | 79  |
|  | 3209 | 75   | 83  | 10   | 2.4 | 31  | 28  |
|  | 3227 | 120  | 67  | -42  | 9.3 | 147 | 138 |
|  | 3243 | 42   | 38  | -9.2 | 9.4 | 27  | 17  |
|  | 3249 | 62   | 58  | -5.9 | 6.6 | 89  | 82  |
|  | 3312 | 1100 | 670 | -40  | 4.0 | 28  | 24  |
|  | 3315 | 24   | 27  | 14   | 11  | 27  | 17  |
|  | 3324 | 150  | 120 | -21  | 28  | 119 | 91  |
|  | 3328 | 10   | 6.3 | -37  | 13  | 119 | 106 |
|  | 3351 | 47   | 46  | -2.6 | 4.0 | 59  | 55  |
|  | 3368 | 14   | 16  | 8.3  | 3.6 | 28  | 24  |
|  | 3375 | 48   | 24  | -50  | 34  | 143 | 109 |
|  | 3380 | 240  | 190 | -21  | 12  | 47  | 36  |
|  | 3442 | 21   | 17  | -21  | 8.6 | 99  | 90  |
|  | 3443 | 26   | 14  | -48  | 9.9 | 75  | 65  |
|  | 3448 | 200  | 68  | -66  | 14  | 172 | 158 |
|  | 3459 | 22   | 23  | 4.3  | 2.0 | 34  | 32  |
|  | 3467 | 62   | 31  | -50  | 9.9 | 338 | 328 |
|  | 3483 | 27   | 42  | 52   | 3.1 | 98  | 94  |
|  | 3489 | 140  | 54  | -61  | 5.4 | 115 | 110 |
|  | 3495 | 7.6  | 5.2 | -31  | 5.7 | 113 | 107 |
|  | 3505 | 52   | 45  | -14  | 20  | 142 | 122 |
|  | 3518 | 170  | 80  | -51  | 4.0 | 85  | 81  |
|  | 3519 | 110  | 120 | 7.9  | 31  | 51  | 20  |
|  | 3524 | 150  | 80  | -46  | 5.4 | 51  | 46  |
|  | 3537 | 19   | 12  | -39  | 8.0 | 82  | 74  |
|  | 3541 | 50   | 35  | -29  | 6.6 | 74  | 67  |
|  | 3547 | 66   | 64  | -3.2 | 6.2 | 46  | 39  |
|  | 3554 | 16   | 8.4 | -47  | 25  | 170 | 145 |

|             |      |      |      |      |     |     |     |
|-------------|------|------|------|------|-----|-----|-----|
|             | 3568 | 360  | 290  | -19  | 49  | 144 | 95  |
|             | 3573 | 15   | 31   | 101  | 14  | 25  | 11  |
|             | 3580 | 110  | 86   | -24  | 3.8 | 27  | 24  |
|             | 3591 | 19   | 18   | -6.0 | 21  | 87  | 67  |
|             | 3595 | 120  | 65   | -45  | 1.9 | 106 | 104 |
|             | 3617 | 41   | 23   | -43  | 6.3 | 77  | 71  |
|             | 3633 | 110  | 82   | -22  | 98  | 191 | 94  |
|             | 3637 | 110  | 53   | -50  | 51  | 121 | 70  |
|             | 3638 | 47   | 22   | -52  | 1.9 | 40  | 39  |
|             | 3652 | 79   | 35   | -56  | 9.8 | 138 | 128 |
|             | 3654 | 24   | 11   | -52  | 15  | 153 | 138 |
|             | 3660 | 47   | 29   | -38  | 7.2 | 148 | 141 |
|             | 3674 | 69   | 35   | -50  | 31  | 143 | 112 |
|             | 3676 | 64   | 48   | -25  | 87  | 222 | 135 |
|             | 3692 | 110  | 90   | -19  | 4.3 | 107 | 103 |
|             | 3715 | 150  | 160  | 7.0  | 3.5 | 143 | 140 |
|             | 3721 | 6.9  | 7.1  | 3.0  | 3.5 | 14  | 11  |
|             | 3724 | 18   | 15   | -18  | 6.5 | 54  | 48  |
|             | 3753 | 41   | 26   | -36  | 11  | 72  | 62  |
|             | 3760 | 250  | 220  | -14  | 7.4 | 199 | 192 |
|             | 3778 | 53   | 28   | -47  | 4.5 | 219 | 214 |
|             | 3787 | 4.9  | 4.8  | -1.7 | 8.1 | 144 | 136 |
|             | 3821 | 210  | 290  | 36   | 3.0 | 50  | 47  |
|             | 3824 | 44   | 39   | -11  | 2.8 | 19  | 16  |
|             | 3834 | 290  | 170  | -43  | 12  | 143 | 132 |
|             | 3849 | 390  | 410  | 3.7  | 11  | 49  | 38  |
|             | 3859 | 53   | 61   | 14   | 4.0 | 141 | 137 |
|             | 3861 | 6.8  | 3.9  | -43  | 9.7 | 146 | 136 |
|             | 3878 | 62   | 34   | -45  | 12  | 144 | 133 |
|             | 3888 | 200  | 130  | -34  | 3.0 | 118 | 115 |
|             | 3890 | 40   | 40   | -0.2 | 13  | 37  | 24  |
|             | 3891 | 34   | 22   | -35  | 54  | 75  | 21  |
|             | 3900 | 240  | 220  | -9.0 | 2.0 | 66  | 64  |
|             | 3932 | 140  | 96   | -31  | 3.8 | 148 | 144 |
|             | 3948 | 46   | 47   | 1.6  | 16  | 114 | 98  |
|             | 3954 | 33   | 22   | -34  | 4.2 | 125 | 121 |
|             | 3960 | 280  | 300  | 6.2  | 4.4 | 89  | 84  |
|             | 3985 | 34   | 32   | -5.3 | 4.5 | 77  | 72  |
|             | 3995 | 1000 | 1500 | 48   | 12  | 22  | 10  |
|             | 4006 | 58   | 42   | -28  | 8.3 | 57  | 49  |
|             | 4015 | 150  | 97   | -34  | 3.9 | 119 | 115 |
|             | 4029 | 390  | 270  | -32  | 8.4 | 29  | 20  |
|             | 4075 | 210  | 150  | -30  | 9.1 | 53  | 44  |
| Nordiazepam | 2330 | 41   | 31   | -26  | 8.9 | 244 | 235 |
|             | 2339 | 26   | 18   | -33  | 6.8 | 77  | 70  |
|             | 2371 | 17   | 25   | 53   | 22  | 141 | 119 |
|             | 2438 | 35   | 5.5  | -84  | 7.9 | 221 | 213 |
|             | 2451 | 50   | 32   | -35  | 3.2 | 61  | 57  |
|             | 2483 | 20   | 8.4  | -58  | 4.8 | 78  | 73  |
|             | 2498 | 350  | 250  | -30  | 3.5 | 139 | 136 |
|             | 2525 | 94   | 130  | 36   | 8.6 | 77  | 68  |

|  |      |     |     |      |     |     |     |
|--|------|-----|-----|------|-----|-----|-----|
|  | 2526 | 71  | 100 | 42   | 8.3 | 151 | 143 |
|  | 2561 | 180 | 87  | -52  | 5.4 | 16  | 11  |
|  | 2570 | 300 | 150 | -51  | 4.2 | 198 | 194 |
|  | 2581 | 15  | 14  | -4.3 | 4.1 | 38  | 34  |
|  | 2590 | 93  | 39  | -58  | 2.8 | 144 | 141 |
|  | 2622 | 78  | 130 | 69   | 1.8 | 72  | 70  |
|  | 2651 | 410 | 430 | 4.3  | 5.7 | 29  | 23  |
|  | 2658 | 63  | 48  | -24  | 8.6 | 29  | 20  |
|  | 2665 | 86  | 75  | -13  | 14  | 25  | 12  |
|  | 2677 | 170 | 130 | -22  | 19  | 163 | 144 |
|  | 2688 | 140 | 91  | -35  | 21  | 67  | 46  |
|  | 2697 | 14  | 6.7 | -51  | 5.2 | 216 | 210 |
|  | 2711 | 120 | 76  | -35  | 6.3 | 27  | 21  |
|  | 2752 | 740 | 310 | -58  | 8.9 | 123 | 114 |
|  | 2754 | 580 | 560 | -4.0 | 6.0 | 47  | 41  |
|  | 2771 | 320 | 180 | -42  | 12  | 93  | 80  |
|  | 2772 | 93  | 79  | -15  | 14  | 120 | 106 |
|  | 2788 | 62  | 63  | 0.4  | 15  | 38  | 22  |
|  | 2789 | 31  | 21  | -30  | 16  | 36  | 21  |
|  | 2800 | 170 | 140 | -13  | 3.1 | 50  | 46  |
|  | 2811 | 43  | 27  | -38  | 25  | 91  | 66  |
|  | 2816 | 450 | 310 | -31  | 15  | 154 | 139 |
|  | 2817 | 280 | 110 | -62  | 7.3 | 53  | 46  |
|  | 2838 | 39  | 20  | -49  | 127 | 197 | 70  |
|  | 2843 | 29  | 37  | 26   | 4.8 | 15  | 10  |
|  | 2876 | 14  | 12  | -10  | 1.8 | 57  | 55  |
|  | 2878 | 190 | 160 | -16  | 26  | 97  | 71  |
|  | 2895 | 34  | 25  | -25  | 5.9 | 50  | 44  |
|  | 2918 | 67  | 35  | -48  | 5.0 | 76  | 71  |
|  | 2927 | 50  | 50  | 0.2  | 11  | 145 | 134 |
|  | 2970 | 99  | 77  | -22  | 3.4 | 91  | 88  |
|  | 2978 | 23  | 17  | -24  | 5.1 | 98  | 93  |
|  | 2979 | 330 | 230 | -32  | 6.1 | 76  | 70  |
|  | 2999 | 240 | 230 | -5.3 | 3.4 | 15  | 12  |
|  | 3031 | 170 | 150 | -12  | 2.2 | 31  | 29  |
|  | 3033 | 19  | 25  | 31   | 6.7 | 173 | 167 |
|  | 3044 | 17  | 9.2 | -46  | 23  | 114 | 91  |
|  | 3073 | 120 | 97  | -15  | 9.7 | 46  | 36  |
|  | 3079 | 210 | 170 | -22  | 5.1 | 38  | 33  |
|  | 3080 | 340 | 120 | -66  | 4.0 | 300 | 296 |
|  | 3085 | 12  | 5.4 | -55  | 6.9 | 76  | 69  |
|  | 3089 | 130 | 88  | -33  | 8.2 | 127 | 119 |
|  | 3115 | 110 | 85  | -26  | 6.9 | 188 | 181 |
|  | 3130 | 150 | 130 | -13  | 10  | 61  | 51  |
|  | 3131 | 110 | 100 | -9.1 | 3.8 | 28  | 24  |
|  | 3137 | 69  | 65  | -5.4 | 4.6 | 42  | 38  |
|  | 3168 | 84  | 110 | 25   | 5.0 | 66  | 61  |
|  | 3174 | 39  | 17  | -57  | 2.8 | 154 | 151 |
|  | 3180 | 400 | 290 | -27  | 2.7 | 383 | 381 |
|  | 3200 | 240 | 150 | -37  | 11  | 72  | 62  |
|  | 3205 | 420 | 360 | -13  | 5.9 | 85  | 79  |

|  |      |     |      |      |     |     |     |
|--|------|-----|------|------|-----|-----|-----|
|  | 3209 | 68  | 47   | -30  | 2.4 | 31  | 28  |
|  | 3227 | 56  | 33   | -41  | 9.3 | 147 | 138 |
|  | 3243 | 33  | 32   | -1.1 | 9.4 | 27  | 17  |
|  | 3249 | 110 | 82   | -27  | 6.6 | 89  | 82  |
|  | 3312 | 630 | 410  | -35  | 4.0 | 28  | 24  |
|  | 3315 | 16  | 21   | 29   | 11  | 27  | 17  |
|  | 3324 | 220 | 180  | -16  | 28  | 119 | 91  |
|  | 3351 | 29  | 25   | -12  | 4.0 | 59  | 55  |
|  | 3375 | 14  | 4.3  | -68  | 34  | 143 | 109 |
|  | 3380 | 39  | 32   | -17  | 12  | 47  | 36  |
|  | 3442 | 47  | 27   | -42  | 8.6 | 99  | 90  |
|  | 3448 | 490 | 180  | -63  | 14  | 172 | 158 |
|  | 3459 | 50  | 55   | 8.7  | 2.0 | 34  | 32  |
|  | 3467 | 81  | 44   | -45  | 9.9 | 338 | 328 |
|  | 3483 | 39  | 51   | 29   | 3.1 | 98  | 94  |
|  | 3489 | 350 | 120  | -67  | 5.4 | 115 | 110 |
|  | 3495 | 26  | 13   | -49  | 5.7 | 113 | 107 |
|  | 3505 | 93  | 77   | -18  | 20  | 142 | 122 |
|  | 3518 | 30  | 12   | -60  | 4.0 | 85  | 81  |
|  | 3519 | 190 | 2100 | 5.7  | 31  | 51  | 20  |
|  | 3524 | 48  | 24   | -50  | 5.4 | 51  | 46  |
|  | 3537 | 84  | 45   | -46  | 8.0 | 82  | 74  |
|  | 3541 | 160 | 100  | -36  | 6.6 | 74  | 67  |
|  | 3547 | 270 | 250  | -9.0 | 6.2 | 46  | 39  |
|  | 3554 | 17  | 7.1  | -59  | 25  | 170 | 145 |
|  | 3565 | 18  | 16   | -12  | 24  | 121 | 97  |
|  | 3568 | 250 | 240  | -4.9 | 49  | 144 | 95  |
|  | 3573 | 120 | 120  | 4.2  | 14  | 25  | 11  |
|  | 3580 | 180 | 130  | -29  | 3.8 | 27  | 24  |
|  | 3591 | 120 | 100  | -12  | 21  | 87  | 67  |
|  | 3595 | 270 | 160  | -39  | 1.9 | 106 | 104 |
|  | 3610 | 20  | 20   | 3.2  | 60  | 95  | 35  |
|  | 3617 | 52  | 29   | -44  | 6.3 | 77  | 71  |
|  | 3633 | 48  | 50   | 2.9  | 98  | 191 | 94  |
|  | 3637 | 77  | 55   | -28  | 51  | 121 | 70  |
|  | 3638 | 44  | 22   | -51  | 1.9 | 40  | 39  |
|  | 3652 | 120 | 44   | -62  | 9.8 | 138 | 128 |
|  | 3660 | 130 | 100  | -22  | 7.2 | 148 | 141 |
|  | 3674 | 37  | 21   | -44  | 31  | 143 | 112 |
|  | 3676 | 84  | 75   | -10  | 87  | 222 | 135 |
|  | 3692 | 37  | 25   | -32  | 4.3 | 107 | 103 |
|  | 3715 | 270 | 260  | -5.7 | 3.5 | 143 | 140 |
|  | 3721 | 17  | 17   | 2.2  | 3.5 | 14  | 11  |
|  | 3753 | 84  | 52   | -38  | 11  | 72  | 62  |
|  | 3760 | 200 | 160  | -20  | 7.4 | 199 | 192 |
|  | 3778 | 140 | 91   | -36  | 4.5 | 219 | 214 |
|  | 3787 | 15  | 11   | -31  | 8.1 | 144 | 136 |
|  | 3821 | 74  | 78   | 5.1  | 3.0 | 50  | 47  |
|  | 3824 | 66  | 57   | -13  | 2.8 | 19  | 16  |
|  | 3834 | 310 | 190  | -37  | 12  | 143 | 132 |
|  | 3849 | 240 | 170  | -28  | 11  | 49  | 38  |



|          |      |     |     |      |     |     |     |
|----------|------|-----|-----|------|-----|-----|-----|
|          | 3859 | 77  | 47  | -38  | 4.0 | 141 | 137 |
|          | 3878 | 57  | 34  | -41  | 12  | 144 | 133 |
|          | 3888 | 170 | 95  | -43  | 3.0 | 118 | 115 |
|          | 3890 | 84  | 84  | 0.4  | 13  | 37  | 24  |
|          | 3900 | 170 | 150 | -14  | 2.0 | 66  | 64  |
|          | 3906 | 13  | 8.7 | -32  | 20  | 114 | 95  |
|          | 3932 | 180 | 110 | -36  | 3.8 | 148 | 144 |
|          | 3948 | 37  | 26  | -28  | 16  | 114 | 98  |
|          | 3954 | 120 | 70  | -40  | 4.2 | 125 | 121 |
|          | 3960 | 75  | 74  | -2.1 | 4.4 | 89  | 84  |
|          | 3985 | 49  | 36  | -28  | 4.5 | 77  | 72  |
|          | 3995 | 53  | 73  | 38   | 12  | 22  | 10  |
|          | 4006 | 65  | 55  | -16  | 8.3 | 57  | 49  |
|          | 4015 | 640 | 320 | -50  | 3.9 | 119 | 115 |
|          | 4029 | 210 | 150 | -30  | 8.4 | 29  | 20  |
|          | 4075 | 230 | 240 | 3.9  | 9.1 | 53  | 44  |
| Morphine | 2371 | 490 | 8.1 | -98  | 22  | 141 | 119 |
|          | 2392 | 300 | 660 | 121  | 14  | 183 | 169 |
|          | 2438 | 140 | 6.7 | -95  | 7.9 | 221 | 213 |
|          | 2451 | 41  | 27  | -34  | 3.2 | 61  | 57  |
|          | 2479 | 18  | 13  | -30  | 16  | 199 | 183 |
|          | 2531 | 29  | 79  | 172  | 30  | 83  | 53  |
|          | 2582 | 65  | 76  | 17   | 18  | 46  | 28  |
|          | 2597 | 150 | 250 | 65   | 5.2 | 103 | 98  |
|          | 2598 | 3.2 | 5.8 | 84   | 5.9 | 74  | 68  |
|          | 2614 | 57  | 63  | 10   | 16  | 149 | 133 |
|          | 2622 | 510 | 690 | 36   | 1.8 | 72  | 70  |
|          | 2626 | 2.1 | 4.0 | 87   | 8.9 | 114 | 105 |
|          | 2656 | 30  | 65  | 116  | 8.0 | 150 | 142 |
|          | 2723 | 34  | 35  | 3.8  | 11  | 25  | 14  |
|          | 2739 | 34  | 41  | 21   | 21  | 51  | 31  |
|          | 2771 | 290 | 250 | -14  | 12  | 93  | 80  |
|          | 2780 | 19  | 21  | 13   | 6.3 | 97  | 90  |
|          | 2793 | 8.0 | 140 | 1615 | 23  | 70  | 47  |
|          | 2799 | 41  | 48  | 15   | 51  | 72  | 21  |
|          | 2838 | 140 | 110 | -18  | 127 | 197 | 70  |
|          | 2843 | 19  | 20  | 1.7  | 4.8 | 15  | 10  |
|          | 2878 | 48  | 51  | 6.5  | 26  | 97  | 71  |
|          | 2885 | 68  | 98  | 45   | 149 | 212 | 64  |
|          | 2904 | 72  | 58  | -20  | 40  | 79  | 39  |
|          | 2908 | 220 | 230 | 3.8  | 18  | 40  | 22  |
|          | 2918 | 670 | 530 | -21  | 5.0 | 76  | 71  |
|          | 2923 | 120 | 120 | 6.5  | 22  | 48  | 26  |
|          | 2926 | 47  | 75  | 59   | 4.0 | 140 | 136 |
|          | 2927 | 42  | 0.2 | -100 | 11  | 145 | 134 |
|          | 2941 | 180 | 240 | 39   | 15  | 43  | 28  |
|          | 2942 | 41  | 42  | 2.4  | 1.5 | 37  | 36  |
|          | 2962 | 83  | 200 | 136  | 9.8 | 126 | 117 |
|          | 2970 | 410 | 380 | -8.4 | 3.4 | 91  | 88  |
|          | 2973 | 50  | 48  | -3.2 | 22  | 145 | 122 |
|          | 2978 | 140 | 150 | 8.1  | 5.1 | 98  | 93  |

|  |      |      |      |      |     |     |     |
|--|------|------|------|------|-----|-----|-----|
|  | 2979 | 37   | 370  | 916  | 6.1 | 76  | 70  |
|  | 2985 | 18   | 17   | -2.6 | 19  | 68  | 49  |
|  | 2999 | 370  | 330  | -11  | 3.4 | 15  | 12  |
|  | 3007 | 75   | 86   | 15   | 3.8 | 63  | 59  |
|  | 3012 | 4.1  | 4.8  | 19   | 20  | 47  | 26  |
|  | 3020 | 150  | 5.8  | -96  | 31  | 48  | 17  |
|  | 3031 | 190  | 200  | 8.2  | 2.2 | 31  | 29  |
|  | 3040 | 16   | 420  | 2462 | 18  | 139 | 121 |
|  | 3043 | 150  | 62   | -59  | 11  | 49  | 39  |
|  | 3044 | 100  | 88   | -12  | 23  | 114 | 91  |
|  | 3056 | 290  | 310  | 9.0  | 3.1 | 133 | 130 |
|  | 3058 | 28   | 31   | 10   | 6.1 | 152 | 145 |
|  | 3067 | 190  | 75   | -61  | 3.3 | 56  | 52  |
|  | 3100 | 50   | 45   | -10  | 13  | 83  | 71  |
|  | 3107 | 7.9  | 12   | 49   | 33  | 199 | 166 |
|  | 3137 | 1400 | 1500 | 8.8  | 4.6 | 42  | 38  |
|  | 3142 | 67   | 68   | 2.5  | 4.8 | 157 | 153 |
|  | 3155 | 1400 | 1600 | 21   | 1.3 | 130 | 129 |
|  | 3168 | 72   | 87   | 20   | 5.0 | 66  | 61  |
|  | 3174 | 41   | 86   | 109  | 2.8 | 154 | 151 |
|  | 3180 | 170  | 220  | 32   | 2.7 | 383 | 381 |
|  | 3188 | 9.2  | 650  | 6979 | 17  | 116 | 99  |
|  | 3232 | 160  | 160  | -1.8 | 14  | 21  | 6   |
|  | 3277 | 250  | 340  | 35   | 12  | 191 | 179 |
|  | 3288 | 110  | 67   | -36  | 23  | 96  | 72  |
|  | 3299 | 150  | 120  | -21  | 5.8 | 56  | 50  |
|  | 3302 | 140  | 120  | -15  | 72  | 97  | 24  |
|  | 3307 | 150  | 140  | -5.8 | 18  | 38  | 21  |
|  | 3320 | 96   | 74   | -22  | 194 | 241 | 47  |
|  | 3346 | 72   | 78   | 8.7  | 27  | 280 | 253 |
|  | 3351 | 250  | 240  | -2.7 | 4.0 | 59  | 55  |
|  | 3380 | 350  | 330  | -5.0 | 12  | 47  | 36  |
|  | 3382 | 49   | 130  | 163  | 15  | 73  | 58  |
|  | 3401 | 180  | 200  | 13   | 18  | 34  | 16  |
|  | 3403 | 4.5  | 4.1  | -9.0 | 16  | 124 | 108 |
|  | 3442 | 600  | 270  | -56  | 8.6 | 99  | 90  |
|  | 3448 | 190  | 190  | 3.8  | 14  | 172 | 158 |
|  | 3489 | 6.1  | 5.8  | -4.4 | 5.4 | 115 | 110 |
|  | 3495 | 33   | 30   | -8.1 | 5.7 | 113 | 107 |
|  | 3505 | 11   | 41   | 262  | 20  | 142 | 122 |
|  | 3517 | 29   | 24   | -18  | 5.2 | 61  | 56  |
|  | 3521 | 140  | 170  | 26   | 13  | 77  | 64  |
|  | 3537 | 140  | 190  | 36   | 8.0 | 82  | 74  |
|  | 3547 | 650  | 800  | 23   | 6.2 | 46  | 39  |
|  | 3555 | 68   | 67   | -0.4 | 37  | 56  | 19  |
|  | 3577 | 220  | 250  | 11   | 4.2 | 101 | 97  |
|  | 3587 | 580  | 570  | -1.0 | 9.0 | 71  | 62  |
|  | 3595 | 8.6  | 31   | 257  | 1.9 | 106 | 104 |
|  | 3605 | 4.0  | 19   | 384  | 23  | 163 | 139 |
|  | 3656 | 92   | 83   | -9.4 | 7.7 | 126 | 118 |
|  | 3674 | 4.0  | 5.0  | 26   | 31  | 143 | 112 |

|         |      |     |     |      |     |     |     |
|---------|------|-----|-----|------|-----|-----|-----|
|         | 3685 | 180 | 690 | 290  | 12  | 121 | 109 |
|         | 3692 | 110 | 130 | 18   | 4.3 | 107 | 103 |
|         | 3724 | 150 | 140 | -1.0 | 6.5 | 54  | 48  |
|         | 3748 | 280 | 300 | 5.0  | 11  | 169 | 159 |
|         | 3753 | 360 | 300 | -17  | 11  | 72  | 62  |
|         | 3760 | 8.3 | 9.7 | 18   | 7.4 | 199 | 192 |
|         | 3778 | 340 | 870 | 159  | 4.5 | 219 | 214 |
|         | 3787 | 17  | 49  | 181  | 8.1 | 144 | 136 |
|         | 3793 | 310 | 280 | -10  | 4.0 | 278 | 274 |
|         | 3830 | 110 | 110 | 0.0  | 3.3 | 99  | 95  |
|         | 3848 | 99  | 100 | 2.4  | 11  | 21  | 10  |
|         | 3849 | 330 | 150 | -54  | 11  | 49  | 38  |
|         | 3859 | 16  | 2.6 | -83  | 4.0 | 141 | 137 |
|         | 3861 | 23  | 170 | 663  | 9.7 | 146 | 136 |
|         | 3888 | 50  | 50  | 0.8  | 3.0 | 118 | 115 |
|         | 3891 | 71  | 86  | 21   | 54  | 75  | 21  |
|         | 3900 | 980 | 860 | -12  | 2.0 | 66  | 64  |
|         | 3904 | 36  | 52  | 46   | 3.7 | 206 | 203 |
|         | 3932 | 74  | 130 | 71   | 3.8 | 148 | 144 |
|         | 3944 | 95  | 77  | -19  | 50  | 111 | 61  |
|         | 3948 | 5.6 | 12  | 115  | 16  | 114 | 98  |
|         | 3953 | 4.1 | 23  | 446  | 6.3 | 124 | 118 |
|         | 3963 | 640 | 430 | -33  | 4.4 | 69  | 64  |
|         | 3971 | 79  | 74  | -6.8 | 23  | 115 | 92  |
|         | 3980 | 36  | 55  | 51   | 14  | 38  | 23  |
|         | 3986 | 20  | 18  | -11  | 5.1 | 25  | 19  |
|         | 3989 | 180 | 300 | 62   | 2.1 | 73  | 71  |
|         | 4003 | 170 | 170 | 1.5  | 7.2 | 148 | 141 |
|         | 4006 | 460 | 520 | 13   | 8.3 | 57  | 49  |
|         | 4008 | 16  | 18  | 19   | 4.7 | 31  | 26  |
|         | 4015 | 40  | 27  | -33  | 3.9 | 119 | 115 |
|         | 4042 | 160 | 170 | 9.3  | 6.2 | 77  | 71  |
|         | 4045 | 16  | 16  | -3.3 | 26  | 73  | 47  |
|         | 4055 | 93  | 71  | -23  | 2.1 | 84  | 82  |
|         | 4066 | 480 | 410 | -15  | 4.1 | 43  | 39  |
|         | 4071 | 170 | 130 | -22  | 5.3 | 56  | 51  |
| Codeine | 2390 | 76  | 100 | 34   | 3.5 | 159 | 156 |
|         | 2438 | 14  | 8.0 | -43  | 7.9 | 221 | 213 |
|         | 2451 | 7.6 | 5.3 | -31  | 3.2 | 61  | 57  |
|         | 2522 | 2.4 | 2.6 | 6.0  | 11  | 146 | 135 |
|         | 2532 | 23  | 33  | 45   | 6.5 | 99  | 92  |
|         | 2535 | 26  | 30  | 14   | 5.6 | 142 | 136 |
|         | 2536 | 27  | 30  | 8.0  | 8.9 | 123 | 114 |
|         | 2591 | 28  | 27  | -4.3 | 8.0 | 125 | 117 |
|         | 2598 | 60  | 120 | 98   | 5.9 | 74  | 68  |
|         | 2622 | 32  | 53  | 63   | 1.8 | 72  | 70  |
|         | 2644 | 17  | 40  | 139  | 7.4 | 174 | 166 |
|         | 2654 | 34  | 10  | -70  | 8.1 | 54  | 46  |
|         | 2656 | 11  | 18  | 65   | 8.0 | 150 | 142 |
|         | 2674 | 3.8 | 6.4 | 70   | 11  | 97  | 86  |
|         | 2761 | 55  | 74  | 34   | 142 | 240 | 98  |

|  |      |      |      |      |     |     |     |
|--|------|------|------|------|-----|-----|-----|
|  | 2771 | 27   | 25   | -10  | 12  | 93  | 80  |
|  | 2780 | 3.1  | 3.1  | -0.3 | 6.3 | 97  | 90  |
|  | 2800 | 5.1  | 5.8  | 15   | 3.1 | 50  | 46  |
|  | 2816 | 48   | 52   | 9.2  | 15  | 154 | 139 |
|  | 2842 | 4.5  | 20   | 345  | 3.0 | 41  | 38  |
|  | 2843 | 1000 | 1200 | 16   | 4.8 | 15  | 10  |
|  | 2918 | 2.4  | 1.9  | -20  | 5.0 | 76  | 71  |
|  | 2926 | 8.7  | 7.7  | -12  | 4.0 | 140 | 136 |
|  | 2927 | 6.4  | 4.5  | -29  | 11  | 145 | 134 |
|  | 2970 | 26   | 25   | -3.7 | 3.4 | 91  | 88  |
|  | 2973 | 64   | 120  | 83   | 23  | 145 | 122 |
|  | 2978 | 25   | 24   | -1.3 | 5.1 | 98  | 93  |
|  | 2979 | 11   | 20   | 72   | 6.1 | 76  | 70  |
|  | 2985 | 29   | 33   | 16   | 19  | 68  | 49  |
|  | 3007 | 17   | 21   | 24   | 3.8 | 63  | 59  |
|  | 3020 | 21   | 9.2  | -55  | 31  | 48  | 17  |
|  | 3031 | 28   | 32   | 16   | 2.2 | 31  | 29  |
|  | 3043 | 12   | 6.9  | -40  | 11  | 49  | 39  |
|  | 3056 | 26   | 25   | -2.2 | 3.1 | 133 | 130 |
|  | 3084 | 2.2  | 14   | 559  | 6.0 | 103 | 97  |
|  | 3131 | 4.2  | 3.9  | -6.6 | 3.8 | 28  | 24  |
|  | 3137 | 88   | 110  | 25   | 4.6 | 42  | 38  |
|  | 3142 | 10   | 8.4  | -17  | 4.8 | 157 | 153 |
|  | 3168 | 10   | 12   | 15   | 5.0 | 66  | 61  |
|  | 3174 | 30   | 36   | 21   | 2.8 | 154 | 151 |
|  | 3180 | 19   | 21   | 10   | 2.7 | 383 | 381 |
|  | 3205 | 7.8  | 11   | 45   | 5.9 | 85  | 79  |
|  | 3227 | 61   | 73   | 19   | 9.3 | 147 | 138 |
|  | 3299 | 32   | 21   | -36  | 5.8 | 56  | 50  |
|  | 3312 | 380  | 350  | -9.5 | 4.0 | 28  | 24  |
|  | 3346 | 9.8  | 8.4  | -14  | 27  | 280 | 253 |
|  | 3351 | 33   | 30   | -10  | 4.0 | 59  | 55  |
|  | 3366 | 50   | 59   | 18   | 2.2 | 40  | 38  |
|  | 3380 | 37   | 37   | -1.8 | 12  | 47  | 36  |
|  | 3382 | 19   | 29   | 54   | 15  | 73  | 58  |
|  | 3442 | 48   | 21   | -56  | 8.6 | 99  | 90  |
|  | 3443 | 3.4  | 3.7  | 11   | 9.9 | 75  | 65  |
|  | 3480 | 24   | 29   | 23   | 3.5 | 26  | 22  |
|  | 3489 | 320  | 270  | -18  | 5.4 | 115 | 110 |
|  | 3495 | 110  | 89   | -17  | 5.7 | 113 | 107 |
|  | 3524 | 15   | 15   | -2.7 | 5.4 | 51  | 46  |
|  | 3547 | 87   | 100  | 18   | 6.2 | 46  | 39  |
|  | 3554 | 9.0  | 7.5  | -16  | 25  | 170 | 145 |
|  | 3577 | 28   | 28   | -0.9 | 4.2 | 101 | 97  |
|  | 3656 | 11   | 11   | 0.6  | 7.7 | 126 | 118 |
|  | 3674 | 53   | 50   | -5.1 | 31  | 143 | 112 |
|  | 3685 | 29   | 35   | 20   | 12  | 121 | 109 |
|  | 3692 | 17   | 22   | 24   | 4.3 | 107 | 103 |
|  | 3698 | 7.3  | 11   | 55   | 4.6 | 141 | 137 |
|  | 3724 | 25   | 25   | -1.5 | 6.5 | 54  | 48  |
|  | 3748 | 72   | 68   | -5.6 | 11  | 169 | 159 |

|             |      |     |     |      |     |     |     |
|-------------|------|-----|-----|------|-----|-----|-----|
|             | 3753 | 76  | 68  | -10  | 11  | 72  | 62  |
|             | 3760 | 2.5 | 2.4 | -5.4 | 7.4 | 199 | 192 |
|             | 3763 | 3.6 | 4.1 | 15   | 10  | 145 | 135 |
|             | 3787 | 3.2 | 3.7 | 13   | 8.1 | 144 | 136 |
|             | 3793 | 52  | 46  | -11  | 4.0 | 278 | 274 |
|             | 3830 | 9.5 | 8.7 | -8.5 | 3.3 | 99  | 95  |
|             | 3849 | 33  | 18  | -45  | 11  | 49  | 38  |
|             | 3861 | 4.6 | 14  | 213  | 9.7 | 146 | 136 |
|             | 3888 | 6.4 | 5.8 | -9.5 | 3.0 | 118 | 115 |
|             | 3893 | 2.7 | 2.7 | -1.9 | 7.4 | 100 | 92  |
|             | 3900 | 66  | 58  | -13  | 2.0 | 66  | 64  |
|             | 3904 | 6.2 | 6.7 | 8.4  | 3.7 | 206 | 203 |
|             | 3932 | 13  | 15  | 15   | 3.8 | 148 | 144 |
|             | 3953 | 24  | 37  | 57   | 6.3 | 124 | 118 |
|             | 3963 | 65  | 37  | -43  | 4.4 | 69  | 64  |
|             | 3986 | 650 | 630 | -3.4 | 5.1 | 25  | 19  |
|             | 3989 | 16  | 29  | 81   | 2.1 | 73  | 71  |
|             | 3995 | 4.4 | 80  | 1697 | 12  | 22  | 10  |
|             | 4003 | 13  | 13  | 4.7  | 7.2 | 148 | 141 |
|             | 4006 | 210 | 280 | 34   | 8.3 | 57  | 49  |
|             | 4015 | 960 | 710 | -26  | 3.9 | 119 | 115 |
|             | 4042 | 30  | 29  | -3.5 | 6.2 | 77  | 71  |
|             | 4055 | 7.8 | 5.0 | -36  | 2.1 | 84  | 82  |
|             | 4066 | 54  | 48  | -11  | 4.1 | 43  | 39  |
|             | 4071 | 15  | 12  | -22  | 5.3 | 56  | 51  |
|             | 4092 | 41  | 40  | -1.9 | 11  | 50  | 39  |
| Mirtazapine | 2322 | 86  | 300 | 254  | 4.9 | 132 | 127 |
|             | 2372 | 110 | 8.4 | -92  | 4.0 | 22  | 18  |
|             | 2438 | 140 | 7.0 | -95  | 7.9 | 221 | 213 |
|             | 2535 | 63  | 110 | 69   | 5.6 | 142 | 136 |
|             | 2581 | 110 | 200 | 80   | 4.1 | 38  | 34  |
|             | 2614 | 53  | 78  | 49   | 16  | 149 | 133 |
|             | 2655 | 3.5 | 7.1 | 102  | 8.4 | 26  | 18  |
|             | 2658 | 18  | 120 | 560  | 8.6 | 29  | 20  |
|             | 2824 | 130 | 290 | 121  | 27  | 186 | 159 |
|             | 2835 | 26  | 12  | -53  | 7.7 | 28  | 21  |
|             | 2838 | 3.1 | 13  | 319  | 127 | 197 | 70  |
|             | 2855 | 36  | 130 | 264  | 6.3 | 100 | 93  |
|             | 2869 | 140 | 290 | 113  | 9.4 | 218 | 209 |
|             | 2898 | 98  | 170 | 72   | 3.4 | 50  | 46  |
|             | 2924 | 20  | 59  | 198  | 11  | 26  | 15  |
|             | 2955 | 34  | 100 | 200  | 2.8 | 87  | 84  |
|             | 2970 | 3.4 | 17  | 400  | 3.4 | 91  | 88  |
|             | 2973 | 290 | 340 | 14   | 23  | 145 | 122 |
|             | 2985 | 24  | 32  | 35   | 19  | 68  | 49  |
|             | 2999 | 24  | 26  | 7.8  | 3.4 | 15  | 12  |
|             | 3013 | 8.0 | 86  | 965  | 28  | 65  | 37  |
|             | 3014 | 43  | 5.3 | -87  | 4.3 | 44  | 40  |
|             | 3122 | 64  | 120 | 92   | 2.8 | 18  | 16  |
|             | 3131 | 280 | 370 | 30   | 3.8 | 28  | 24  |
|             | 3132 | 85  | 210 | 150  | 4.1 | 163 | 159 |

|            |      |     |     |      |     |     |     |
|------------|------|-----|-----|------|-----|-----|-----|
|            | 3243 | 33  | 48  | 49   | 9.4 | 27  | 17  |
|            | 3320 | 13  | 11  | -19  | 194 | 241 | 47  |
|            | 3323 | 38  | 48  | 28   | 10  | 26  | 16  |
|            | 3363 | 3.9 | 4.4 | 12   | 8.8 | 28  | 19  |
|            | 3372 | 98  | 260 | 161  | 4.7 | 51  | 47  |
|            | 3384 | 110 | 280 | 145  | 5.6 | 127 | 121 |
|            | 3421 | 50  | 160 | 224  | 9.4 | 122 | 113 |
|            | 3424 | 10  | 23  | 125  | 11  | 74  | 64  |
|            | 3430 | 16  | 30  | 88   | 28  | 76  | 48  |
|            | 3440 | 21  | 34  | 66   | 5.7 | 73  | 67  |
|            | 3451 | 200 | 340 | 72   | 6.7 | 101 | 94  |
|            | 3483 | 18  | 38  | 109  | 3.1 | 98  | 94  |
|            | 3513 | 220 | 110 | -50  | 48  | 84  | 36  |
|            | 3524 | 58  | 67  | 15   | 5.4 | 51  | 46  |
|            | 3568 | 31  | 60  | 91   | 49  | 144 | 95  |
|            | 3622 | 17  | 20  | 21   | 26  | 68  | 43  |
|            | 3630 | 33  | 120 | 278  | 8.6 | 99  | 91  |
|            | 3637 | 49  | 160 | 214  | 51  | 121 | 70  |
|            | 3742 | 25  | 44  | 73   | 5.2 | 52  | 47  |
|            | 3755 | 160 | 310 | 97   | 3.4 | 177 | 174 |
|            | 3767 | 51  | 77  | 50   | 6.8 | 186 | 180 |
|            | 3769 | 63  | 120 | 81   | 12  | 192 | 180 |
|            | 3812 | 18  | 31  | 73   | 4.1 | 196 | 192 |
|            | 3878 | 73  | 220 | 203  | 12  | 144 | 133 |
|            | 3890 | 44  | 61  | 38   | 13  | 37  | 24  |
|            | 3927 | 62  | 140 | 117  | 12  | 69  | 57  |
|            | 3932 | 35  | 67  | 92   | 3.8 | 148 | 144 |
|            | 3944 | 48  | 9.3 | -81  | 50  | 111 | 61  |
|            | 4033 | 51  | 96  | 91   | 11  | 29  | 18  |
|            | 4045 | 140 | 200 | 42   | 26  | 73  | 47  |
| Citalopram | 2303 | 200 | 200 | -0.5 | 13  | 24  | 11  |
|            | 2308 | 300 | 510 | 73   | 3.0 | 123 | 120 |
|            | 2542 | 170 | 9.3 | -95  | 12  | 28  | 16  |
|            | 2582 | 250 | 320 | 28   | 18  | 46  | 28  |
|            | 2655 | 82  | 94  | 15   | 8.4 | 26  | 18  |
|            | 2741 | 260 | 450 | 71   | 8.1 | 148 | 140 |
|            | 2763 | 76  | 100 | 32   | 7.5 | 28  | 21  |
|            | 2780 | 48  | 58  | 20   | 6.3 | 97  | 90  |
|            | 2878 | 12  | 14  | 18   | 26  | 97  | 71  |
|            | 2883 | 200 | 210 | 4.6  | 8.3 | 72  | 64  |
|            | 2904 | 59  | 61  | 5.0  | 40  | 79  | 39  |
|            | 2919 | 110 | 100 | -6.0 | 5.1 | 53  | 48  |
|            | 2928 | 160 | 190 | 16   | 4.0 | 11  | 7.0 |
|            | 3011 | 84  | 110 | 29   | 20  | 188 | 168 |
|            | 3025 | 1.5 | 59  | 3926 | 9.1 | 145 | 136 |
|            | 3037 | 320 | 330 | 2.6  | 78  | 192 | 114 |
|            | 3084 | 110 | 190 | 77   | 6.0 | 103 | 97  |
|            | 3115 | 66  | 89  | 34   | 6.9 | 188 | 181 |
|            | 3142 | 470 | 590 | 27   | 4.8 | 157 | 153 |
|            | 3235 | 110 | 130 | 12   | 6.5 | 27  | 20  |
|            | 3323 | 120 | 140 | 19   | 10  | 26  | 16  |

|  |      |      |      |      |     |     |     |
|--|------|------|------|------|-----|-----|-----|
|  | 3331 | 690  | 710  | 2.3  | 79  | 130 | 52  |
|  | 3372 | 200  | 410  | 110  | 4.7 | 51  | 47  |
|  | 3429 | 250  | 210  | -16  | 30  | 47  | 17  |
|  | 3443 | 180  | 280  | 52   | 9.9 | 75  | 65  |
|  | 3448 | 510  | 660  | 30   | 14  | 172 | 158 |
|  | 3472 | 190  | 290  | 54   | 34  | 198 | 164 |
|  | 3517 | 210  | 450  | 108  | 5.2 | 61  | 56  |
|  | 3519 | 480  | 350  | -27  | 31  | 51  | 20  |
|  | 3579 | 4.4  | 4.9  | 11   | 6.1 | 32  | 26  |
|  | 3661 | 52   | 63   | 23   | 3.6 | 123 | 120 |
|  | 3666 | 67   | 80   | 20   | 9.6 | 49  | 40  |
|  | 3732 | 160  | 190  | 16   | 8.3 | 70  | 62  |
|  | 3735 | 51   | 13   | -75  | 3.7 | 66  | 63  |
|  | 3742 | 42   | 49   | 17   | 5.2 | 52  | 47  |
|  | 3791 | 1000 | 1600 | 51   | 15  | 137 | 121 |
|  | 3796 | 89   | 150  | 64   | 5.3 | 128 | 123 |
|  | 3836 | 530  | 540  | 2.1  | 14  | 145 | 130 |
|  | 3840 | 780  | 1400 | 84   | 4.5 | 52  | 47  |
|  | 3855 | 450  | 740  | 64   | 292 | 478 | 186 |
|  | 3893 | 35   | 71   | 101  | 7.4 | 100 | 92  |
|  | 3906 | 370  | 420  | 13   | 20  | 114 | 95  |
|  | 3918 | 51   | 72   | 41   | 5.0 | 158 | 153 |
|  | 3927 | 180  | 360  | 97   | 12  | 69  | 57  |
|  | 3928 | 33   | 49   | 48   | 14  | 24  | 11  |
|  | 3980 | 190  | 250  | 28   | 14  | 38  | 23  |
|  | 4008 | 21   | 34   | 65   | 4.7 | 31  | 26  |
|  | 4010 | 180  | 230  | 29   | 7.6 | 36  | 28  |
|  | 4041 | 140  | 150  | 6.9  | 60  | 77  | 17  |
|  | 4068 | 630  | 600  | -5.2 | 37  | 60  | 23  |

Table S2: Individual accuracy values for diazepam and nordiazepam mixed effect models; “mathematically calculated concentrations of t1” were calculated based on t2 analytically measured concentration by taking into account  $\Delta t$ ; accuracies compare t1-measured concentration with t1-mathematically calculated concentration.

| Drug (of abuse) | Case number | $\Delta t$<br>(t1-t2) [h] | Measured concentration<br>[ng/mL] |     | Mathematically<br>calculated<br>concentration<br>[ng/mL] | Accuracy [%] |
|-----------------|-------------|---------------------------|-----------------------------------|-----|----------------------------------------------------------|--------------|
|                 |             |                           | t2                                | t1  | t1                                                       |              |
| Diazepam        | 2308        | -120                      | 18                                | 30  | 25                                                       | 120          |
|                 | 2330        | -244                      | 24                                | 29  | 50                                                       | 58           |
|                 | 2339        | -77                       | 26                                | 41  | 33                                                       | 125          |
|                 | 2371        | -119                      | 14                                | 4.5 | 20                                                       | 22           |
|                 | 2451        | -57                       | 96                                | 153 | 114                                                      | 134          |
|                 | 2498        | -136                      | 239                               | 340 | 357                                                      | 95           |
|                 | 2525        | -77                       | 111                               | 78  | 140                                                      | 56           |
|                 | 2656        | -150                      | 5.0                               | 5.7 | 7.8                                                      | 73           |
|                 | 2752        | -123                      | 142                               | 500 | 204                                                      | 246          |
|                 | 2789        | -21                       | 53                                | 71  | 56                                                       | 127          |
|                 | 2817        | -53                       | 147                               | 305 | 172                                                      | 178          |
|                 | 2895        | -44                       | 82                                | 85  | 94                                                       | 91           |
|                 | 2924        | -26                       | 10                                | 10  | 11                                                       | 93           |
|                 | 2927        | -145                      | 131                               | 57  | 201                                                      | 28           |
|                 | 2978        | -93                       | 24                                | 31  | 31                                                       | 98           |
|                 | 2979        | -70                       | 51                                | 91  | 63                                                       | 143          |
|                 | 3137        | -38                       | 132                               | 125 | 148                                                      | 84           |
|                 | 3227        | -147                      | 67                                | 115 | 104                                                      | 111          |
|                 | 3249        | -82                       | 58                                | 62  | 75                                                       | 83           |
|                 | 3375        | -109                      | 24                                | 48  | 33                                                       | 144          |
|                 | 3489        | -110                      | 54                                | 140 | 75                                                       | 187          |
|                 | 3524        | -46                       | 80                                | 150 | 92                                                       | 163          |
|                 | 3547        | -39                       | 64                                | 66  | 72                                                       | 92           |
|                 | 3617        | -77                       | 23                                | 41  | 29                                                       | 141          |
|                 | 3760        | -199                      | 215                               | 249 | 388                                                      | 64           |
|                 | 3824        | -16                       | 39                                | 44  | 41                                                       | 107          |
|                 | 3891        | -21                       | 22                                | 34  | 24                                                       | 144          |
|                 | 4029        | -29                       | 265                               | 392 | 289                                                      | 136          |
| Nordiazepam     | 2451        | -57                       | 32                                | 50  | 38                                                       | 129          |
|                 | 2526        | -151                      | 101                               | 71  | 160                                                      | 44           |
|                 | 2570        | -194                      | 148                               | 302 | 267                                                      | 113          |
|                 | 2581        | -34                       | 14                                | 15  | 16                                                       | 94           |
|                 | 2622        | -70                       | 132                               | 78  | 163                                                      | 48           |
|                 | 2788        | -22                       | 63                                | 62  | 67                                                       | 93           |
|                 | 2789        | -21                       | 21                                | 31  | 23                                                       | 134          |
|                 | 2811        | -66                       | 27                                | 43  | 33                                                       | 131          |
|                 | 2843        | -10                       | 37                                | 29  | 38                                                       | 77           |
|                 | 2970        | -88                       | 77                                | 99  | 101                                                      | 98           |
|                 | 3174        | -154                      | 17                                | 39  | 27                                                       | 146          |
|                 | 3227        | -147                      | 33                                | 56  | 51                                                       | 109          |
|                 | 3249        | -82                       | 82                                | 111 | 105                                                      | 106          |



|  |      |      |     |     |     |     |
|--|------|------|-----|-----|-----|-----|
|  | 3448 | -158 | 177 | 485 | 287 | 169 |
|  | 3537 | -74  | 45  | 84  | 57  | 148 |
|  | 3568 | -107 | 241 | 253 | 334 | 76  |
|  | 3573 | -23  | 124 | 119 | 133 | 89  |
|  | 3617 | -77  | 29  | 52  | 37  | 140 |
|  | 3676 | -135 | 75  | 84  | 113 | 74  |
|  | 3787 | -136 | 11  | 15  | 16  | 96  |
|  | 3821 | -47  | 78  | 74  | 90  | 82  |
|  | 3824 | -16  | 57  | 66  | 60  | 109 |
|  | 3888 | -115 | 95  | 167 | 134 | 124 |
|  | 3900 | -64  | 148 | 172 | 179 | 96  |
|  | 3954 | -121 | 70  | 117 | 101 | 116 |
|  | 3985 | -72  | 36  | 49  | 44  | 111 |

Table S3: List of lower limits of quantification (LLOQ) for the discussed drugs (of abuse) including their corresponding calibration ranges (<sup>12</sup>C and <sup>13</sup>C calibration)

| Drug (of abuse)    | Drug class     | LLOQ<br>[ng/mL] | Calibration range<br>[ng/mL] |
|--------------------|----------------|-----------------|------------------------------|
| <b>Diazepam</b>    | Benzodiazepine | 5.3             | 5.3 – 10'500                 |
| <b>Nordiazepam</b> | Benzodiazepine | 9.4             | 9.4 – 18'750                 |
| <b>Morphine</b>    | Opioid         | 2.0             | 2.0 – 16'000                 |
| <b>Codeine</b>     | Opioid         | 2.0             | 2.0 – 16'000                 |
| <b>Citalopram</b>  | Antidepressant | 5.0             | 5.0 – 9'600                  |
| <b>Mirtazapine</b> | Antidepressant | 5.0             | 5.0 – 4'800                  |
